# Supplementary material
Source: publisher site journal article supplement (https://www.spandidos-publications.com/2794/downloadSupplementary)

Figure S1. Transfection efficiency of si-STIM1 in vascular smooth muscle cells was analyzed using (A) reverse transcription-quantitative PCR and (B) western blotting. n=3; \*P<0.05 vs. si-NC (unpaired Student's t-test). si, small interfering RNA; STIM1, stromal interaction molecular 1; NC, negative control.

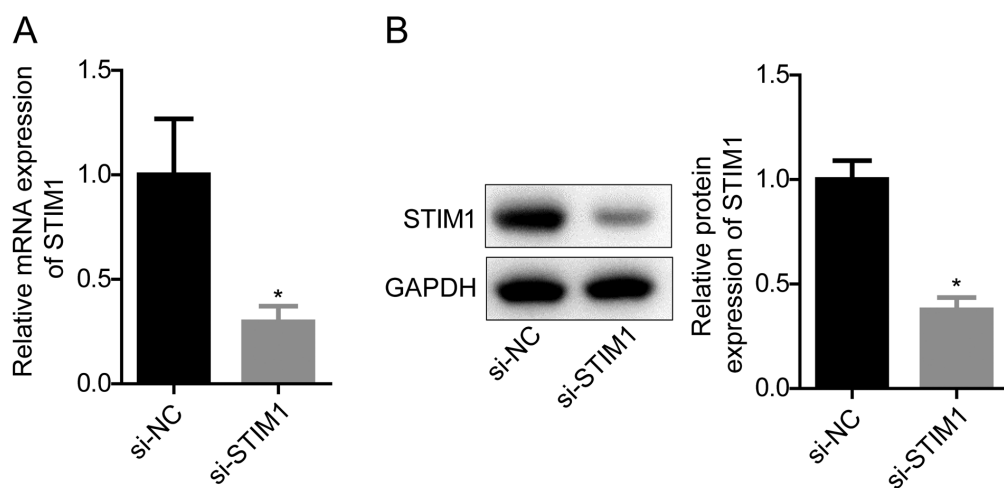

Supplement: Supplementary file 1 [file downloadSupplementary]
